# Supplementary material
Source: publisher site journal article supplement (https://www.dovepress.com/article/560641)
Supplement: Supplementary file 1 [file supplement.docx]

Table S1. Group, time, and group × time effects across all indicators

| Dependent variable | Group | | | Time | | | Group × time interaction | | | |
| --- | --- | --- | --- | --- | --- | --- | --- | --- | --- | --- |
| F | *p* | partial η² | F | *p* | partial η² | F | *p* | partial η² | Cohen’s d |
| Exercise time | 0.422 | 0.516 | 0.001 | 89.723 | < 0.001 | 0.180 | 0.140 | 0.709 | < 0.001 | 0.611 |
| Maximum load | 0.001 | 0.970 | < 0.001 | 196.636 | < 0.001 | 0.324 | 0.001 | 0.980 | < 0.001 | 0.935 |
| RER | 1.086 | 0.298 | 0.003 | 11.636 | < 0.001 | 0.028 | 0.105 | 0.746 | < 0.001 | 0.193 |
| Peak VO2 | 0.054 | 0.816 | < 0.001 | 197.347 | < 0.001 | 0.325 | 0.303 | 0.582 | < 0.001 | 0.930 |
| AT VO2 | 0.862 | 0.354 | 0.002 | 92.025 | < 0.001 | 0.183 | 3.498 | 0.062 | 0.008 | 0.672 |
| Resting HR | 2.601 | 0.108 | 0.006 | 40.592 | < 0.001 | 0.090 | 1.741 | 0.188 | 0.004 | -0.480 |
| Peaking HR | 2.775 | 0.097 | 0.007 | 1.806 | 0.180 | 0.004 | 0.697 | 0.404 | 0.002 | 0.033 |
| HRR | 0.247 | 0.620 | < 0.001 | 23.867 | < 0.001 | 0.055 | 0.011 | 0.915 | < 0.001 | 0.343 |
| Resting SBP | 0.002 | 0.965 | < 0.001 | 18.919 | < 0.001 | 0.044 | 0.331 | 0.566 | 0.001 | -0.292 |
| Resting DBP | 0.134 | 0.715 | < 0.001 | 24.419 | < 0.001 | 0.056 | 0.039 | 0.844 | < 0.001 | -0.318 |
| Peaking SBP | 0.091 | 0.764 | < 0.001 | 0.901 | 0.343 | 0.002 | 0.160 | 0.690 | < 0.001 | 0.053 |
| Peaking DBP | 0.394 | 0.530 | 0.001 | 1.695 | 0.194 | 0.004 | 1.652 | 0.199 | 0.004 | -0.108 |
| O2 pulse | 0.014 | 0.906 | < 0.001 | 126.231 | < 0.001 | 0.235 | 0.038 | 0.845 | < 0.001 | 0.746 |
| VO2/WR | 0.032 | 0.857 | < 0.001 | 5.533 | 0.019 | 0.013 | 0.006 | 0.941 | < 0.001 | 0.163 |
| VE/VCO2@AT | 0.009 | 0.926 | < 0.001 | 20.646 | < 0.001 | 0.048 | 2.257 | 0.134 | 0.005 | -0.307 |
| VE/VCO2 slope | 1.208 | 0.272 | 0.003 | 3.483 | 0.063 | 0.008 | 0.006 | 0.936 | < 0.001 | -0.087 |
| PETCO2 | 1.323 | 0.251 | 0.0033 | 2.364 | 0.125 | 0.006 | 0.057 | 0.811 | < 0.001 | -0.142 |
| GAD-7 | 0.12 | 0.729 | < 0.001 | 65.614 | < 0.001 | 0.138 | 0.049 | 0.826 | < 0.001 | -0.529 |
| PHQ-9 | 0.008 | 0.929 | < 0.001 | 63.962 | < 0.001 | 0.135 | 0.037 | 0.847 | < 0.001 | -0.531 |
| Waist circumference | 0.008 | 0.929 | < 0.001 | 25.190 | < 0.001 | 0.058 | 0.162 | 0.688 | < 0.001 | -0.338 |
| Hip circumference | 0.008 | 0.927 | < 0.001 | 0.146 | 0.702 | ＜0.001 | 0.256 | 0.613 | < 0.001 | -0.022 |
| Left thigh circumference | 2.866 | 0.091 | 0.007 | 0.852 | 0.357 | 0.002 | 3.120 | 0.078 | 0.008 | 0.005 |
| Right thigh circumference | 4.351 | 0.038 | 0.010 | 0.388 | 0.533 | 0.001 | 5.505 | 0.019 | 0.013 | -0.028 |
| Left calf circumference | 1.645 | 0.200 | 0.004 | 3.669 | 0.056 | 0.009 | 1.208 | 0.272 | 0.003 | -0.085 |
| Right calf circumference | 1.280 | 0.259 | 0.003 | 2.768 | 0.097 | 0.007 | 0.893 | 0.345 | 0.002 | -0.073 |
| Left upper arm | 0.704 | 0.402 | 0.002 | 9.456 | ＜0.001 | 0.023 | 1.703 | 0.193 | 0.004 | -0.234 |

Table S2. Cohen's d (pre vs post within each group and between-group differences in change)

|  | | HIIT（n=82） | | | | | MIIT（n=127） | | | | HIIT vs MIIT | |
| --- | --- | --- | --- | --- | --- | --- | --- | --- | --- | --- | --- | --- |
| Indicator | | Baseline | | Change | *p* | Cohen’s d | Baseline | Change | *p* | Cohen’s d | *p* | Cohen’s d |
| Cardio-pulmonary fitness |  | |  | | | | | | | | |  |
| HRR (bpm) | | 17.1±8.9 | | 3.1±8.7 | 0.002 | 0.356 | 18.2±9.2 | 3.0±10.0 | 0.001 | 0.300 | 0.816 | 0.011 |
| Resting HR (bpm) | | 82.6±15.2 | | -7.0±12.9 | < 0.001 | -0.543 | 80.9±14.7 | -4.6±13.8 | < 0.001 | -0.333 | 0.249 | -0.178 |
| Peaking HR (bpm) | | 136.0±20.4 | | 0.6±16.7 | 0.752 | 0.036 | 131.4±20.5 | 2.5±17.1 | 0.102 | 0.146 | 0.850 | -0.112 |
| Peak VO2 (ml/min/kg) | | 19.4±3.7 | | 3.3±2.8 | < 0.001 | 1.179 | 18.4±4.9 | 3.0±3.6 | < 0.001 | 0.833 | 0.122 | 0.091 |
| AT VO2 (ml/min/kg) | | 12.3±2.4 | | 1.9±2.3 | < 0.001 | 0.826 | 12.1±2.7 | 1.3±2.5 | < 0.001 | 0.520 | 0.010 | 0.248 |
| Exercise time (s) | | 473.6±115.1 | | 67.8±120.8 | < 0.001 | 0.561 | 458.6±120.4 | 73.3±106.9 | < 0.001 | 0.686 | 0.898 | -0.049 |
| Maximum load (w) | | 94.8±33.8 | | 17.2±13.5 | < 0.001 | 1.274 | 93.1±37.9 | 17.2±20.6 | < 0.001 | 0.835 | 0.375 | < 0.001 |
| RER | | 1.2±0.1 | | 0.02±0.1 | 0.039 | 0.200 | 1.2±0.1 | 0.03±0.1 | 0.009 | 0.300 | 0.198 | -0.100 |
| Resting SBP (mmHg) | | 124.4±21.2 | | -4.7±19.2 | 0.029 | -0.245 | 122.4±18.4 | -6.1±17.9 | < 0.001 | -0.341 | 0.349 | 0.076 |
| Resting DBP (mmHg) | | 75.3±11.5 | | -4.2±13.3 | 0.006 | -0.316 | 76.3±12.4 | -4.5±13.4 | < 0.001 | -0.336 | 0.965 | 0.022 |
| Peaking SBP (mmHg) | | 170.7±31.1 | | 2.7±30.6 | 0.420 | 0.088 | 166.2±31.6 | 1.1±29.4 | 0.669 | 0.037 | 0.198 | 0.054 |
| Peaking DBP (mmHg) | | 86.2±13.8 | | -2.5±15.3 | 0.142 | -0.163 | 85.9±12.5 | -0.02±15 | 0.991 | 0.001 | 0.261 | -0.164 |
| O2 pulse (mL/beat) | | 9.3±2.7 | | 1.2±1.5 | < 0.001 | 0.800 | 9.2±2.8 | 1.3±1.8 | < 0.001 | 0.722 | 0.550 | -0.059 |
| VO2/WR (mL/min/w) | | 10.3±1.6 | | 0.3±1.8 | 0.137 | 0.167 | 10.3±1.8 | 0.3±2.1 | 0.096 | 0.143 | 0.907 | < 0.001 |
| VE/VCO2@AT | | 28.5±3.5 | | -1.2±2.7 | < 0.001 | -0.444 | 29.2±4.2 | -0.6±3.0 | 0.028 | -0.200 | 0.013 | -0.208 |
| VE/VCO2 slope | | 27.4±4.0 | | -0.5±3.9 | 0.234 | -0.128 | 28.9±5.8 | -0.5±3.9 | 0.176 | -0.128 | 0.223 | < 0.001 |
| PETCO2 (mmHg) | | 34.1±3.4 | | -0.3±3.0 | 0.374 | -0.100 | 33.1±3.7 | -0.4±3.7 | 0.215 | -0.108 | 0.125 | 0.029 |
| Psychological scale (score) |  | |  | | | | | | | | |  |
| GAD-7 | | 4.5±4.6 | | -2.5±3.7 | < 0.001 | -0.676 | 5.2±5.9 | -2.6±4.9 | < 0.001 | -0.531 | 0.679 | 0.022 |
| PHQ-9 | | 4.1±3.8 | | -2.0±3.1 | < 0.001 | -0.645 | 5.1±5.3 | -1.9±3.7 | < 0.001 | -0.514 | 0.176 | 0.029 |
| Body circumference (cm) |  | |  | | | | | | | | |  |
| Waist circumference | | 83.5±10.8 | | -1.7±5.4 | 0.005 | -0.315 | 84.8±10.3 | -1.5±4.2 | < 0.001 | -0.357 | 0.493 | -0.042 |
| Hip circumference | | 94.3±7.1 | | -0.3±5.4 | 0.616 | -0.056 | 95.5±6.8 | 0.04±3.4 | 0.908 | 0.012 | 0.266 | -0.079 |
| Left thigh circumference | | 50.0±5.0 | | -0.2±4.2 | 0.575 | -0.048 | 49.8±5.8 | 0.7±4.2 | 0.049 | 0.167 | 0.083 | -0.214 |
| Right thigh circumference | | 50.4±5.1 | | -0.5±4.0 | 0.257 | -0.125 | 50.0±5.8 | 0.8±4.3 | 0.032 | 0.186 | 0.025 | -0.311 |
| Left calf circumference | | 34.4±4.2 | | -0.1±3.2 | < 0.001 | -0.031 | 35.4±3.6 | -0.5±1.9 | < 0.001 | -0.263 | 0.901 | 0.152 |
| Right calf circumference | | 34.5±4.2 | | -0.1±3.2 | 0.740 | -0.031 | 35.4±3.5 | -0.4±1.9 | 0.008 | -0.211 | 0.923 | 0.114 |
| Left upper arm | | 28.1±2.9 | | -0.6±2.0 | 0.004 | -0.300 | 28.2±3.2 | -0.3±2.4 | 0.233 | -0.125 | 0.170 | -0.136 |
| Right upper arm | | 28.5±3.0 | | -0.8±2.3 | 0.004 | 0.348 | 28.5±3.1 | -0.3±2.2 | 0.157 | -0.136 | 0.085 | -0.223 |

Table S3. Predictors of change variables and group × predictor interaction effects

| Change variable | HIIT× Predictor（n=82） | | | | | MIIT× Predictor（n=127） | | | | | Pooled model (n = 209, Group × Predictor interaction) | | | | |
| --- | --- | --- | --- | --- | --- | --- | --- | --- | --- | --- | --- | --- | --- | --- | --- |
| *β* | 95%CI | *p* | *R2* | *AdjustedR²* | *β* | 95%CI | *p* | *R2* | *Adjusted R²* | *β* | 95%CI | *p* | *R2* | *Adjusted R²* |
| Resting HR | -0.178 | (-0.329, -0.027) | 0.0216 | 0.099 | 0.052 | -0.237 | (-0.365, -0.108) | < 0.001 | 0.132 | 0.104 | -0.207 | (-0.304, -0.110) | < 0.001 | 0.092 | 0.074 |
| Peaking HR | 0.113 | (-0.002, 0.229) | 0.0541 | 0.080 | 0.032 | 0.051 | (-0.053, 0.155) | 0.335 | 0.045 | 0.014 | 0.077 | (0.000, 0.155) | 0.050 | 0.031 | 0.012 |
| GAD-7 | -0.346 | (-0.879, 0.186) | 0.199 | 0.055 | 0.006 | -0.165 | (-0.536, 0.207) | 0.382 | 0.044 | 0.012 | -0.236 | (-0.535, 0.063) | 0.121 | 0.024 | 0.005 |
| PHQ-9 | -0.281 | (-0.919, 0.356) | 0.382 | 0.044 | -0.006 | -0.067 | (-0.555, 0.420) | 0.785 | 0.038 | 0.007 | -0.122 | (-0.506, 0.262) | 0.532 | 0.014 | -0.005 |
| Exercise time | 0.012 | (-0.005, 0.028) | 0.159 | 0.059 | 0.010 | 0.012 | (-0.005, 0.028) | 0.173 | 0.052 | 0.021 | 0.011 | (-0.001, 0.023) | 0.071 | 0.028 | 0.009 |
| Maximum load | 0.086 | (-0.065, 0.236) | 0.262 | 0.050 | 0.001 | 0.049 | (-0.041, 0.140) | 0.280 | 0.047 | 0.016 | 0.052 | (-0.024, 0.127) | 0.179 | 0.021 | 0.002 |
| Peak VO2 | 0.033 | (-0.233, 0.299) | 0.806 | 0.035 | -0.015 | -0.189 | (-0.689, 0.312) | 0.457 | 0.042 | 0.011 | 0.008 | (-0.233, 0.249) | 0.945 | 0.012 | -0.007 |
| AT VO2 | 0.303 | (-0.548, 1.154) | 0.481 | 0.040 | -0.009 | 0.139 | (-0.595, 0.873) | 0.709 | 0.039 | 0.007 | 0.123 | (-0.423, 0.669) | 0.657 | 0.013 | -0.006 |

Table S4. Normality test results for dependent variables

| Dependent variable | group | statistics | df |  |
| --- | --- | --- | --- | --- |
| Exercise time | MIIT | .968 | 127 | .007 |
| HIIT | .982 | 82 | .356 |
| Maximum load | MIIT | .964 | 127 | .003 |
| HIIT | .960 | 82 | .014 |
| RER | MIIT | .967 | 127 | .006 |
| HIIT | .988 | 82 | .650 |
| Peak VO2 | MIIT | .956 | 127 | .001 |
| HIIT | .953 | 82 | .006 |
| AT VO2 | MIIT | .984 | 127 | .175 |
| HIIT | .961 | 82 | .017 |
| Resting HR | MIIT | .987 | 127 | .343 |
| HIIT | .962 | 82 | .021 |
| Peaking HR | MIIT | .994 | 127 | .891 |
| HIIT | .990 | 82 | .816 |
| HRR | MIIT | .958 | 127 | .001 |
| HIIT | .956 | 82 | .009 |
| Resting SBP | MIIT | .978 | 127 | .052 |
| HIIT | .974 | 82 | .114 |
| Resting DBP | MIIT | .983 | 127 | .155 |
| HIIT | .988 | 82 | .692 |
| Peaking SBP | MIIT | .982 | 127 | .122 |
| HIIT | .986 | 82 | .571 |
| Peaking DBP | MIIT | .988 | 127 | .401 |
| HIIT | .982 | 82 | .349 |
| O2pulse | MIIT | .957 | 127 | .001 |
| HIIT | .965 | 82 | .032 |
| VO2/WR | MIIT | .985 | 127 | .238 |
| HIIT | .971 | 82 | .069 |
| VE/VCO2@AT | MIIT | .972 | 127 | .017 |
| HIIT | .974 | 82 | .109 |
| VE/VCO2 slope | MIIT | .981 | 127 | .091 |
| HIIT | .985 | 82 | .499 |
| PETCO2 | MIIT | .979 | 127 | .065 |
| HIIT | .989 | 82 | .776 |
| GAD-7 | MIIT | .759 | 127 | .000 |
| HIIT | .756 | 82 | .000 |
| PHQ-9 | MIIT | .804 | 127 | .000 |
| HIIT | .771 | 82 | .000 |
| Waist circumference | MIIT | .964 | 127 | .003 |
| HIIT | .976 | 82 | .141 |
| Hip circumference | MIIT | .925 | 127 | .000 |
| HIIT | .974 | 82 | .108 |
| Left thigh circumference | MIIT | .930 | 127 | .000 |
| HIIT | .980 | 82 | .256 |
| Right thigh circumference | MIIT | .942 | 127 | .000 |
| HIIT | .977 | 82 | .167 |
| Left calf circumference | MIIT | .948 | 127 | .000 |
| HIIT | .975 | 82 | .123 |
| Right calf circumference | MIIT | .949 | 127 | .000 |
| HIIT | .976 | 82 | .144 |
| Left upper arm | MIIT | .944 | 127 | .000 |
| HIIT | .981 | 82 | .297 |
| Right upper arm | MIIT | .940 | 127 | .000 |
| HIIT | .987 | 82 | .606 |

Table S5. Residual normality test results for dependent variables

| Dependent variable | group | statistics | df | *p* |
| --- | --- | --- | --- | --- |
| Exercise time | MIIT | .993 | 127 | .825 |
| HIIT | .988 | 82 | .659 |
| Maximum load | MIIT | .980 | 127 | .073 |
| HIIT | .981 | 82 | .293 |
| RER | MIIT | .986 | 127 | .274 |
| HIIT | .991 | 82 | .873 |
| Peak VO2 | MIIT | .982 | 127 | .117 |
| HIIT | .990 | 82 | .823 |
| AT VO2 | MIIT | .993 | 127 | .807 |
| HIIT | .976 | 82 | .152 |
| Resting HR | MIIT | .991 | 127 | .667 |
| HIIT | .974 | 82 | .117 |
| Peaking HR | MIIT | .991 | 127 | .695 |
| HIIT | .992 | 82 | .931 |
| HRR | MIIT | .984 | 127 | .166 |
| HIIT | .983 | 82 | .365 |
| Resting SBP | MIIT | .991 | 127 | .606 |
| HIIT | .985 | 82 | .476 |
| Resting DBP | MIIT | .987 | 127 | .350 |
| HIIT | .980 | 82 | .245 |
| Peaking SBP | MIIT | .983 | 127 | .159 |
| HIIT | .979 | 82 | .241 |
| Peaking DBP | MIIT | .979 | 127 | .068 |
| HIIT | .991 | 82 | .850 |
| O2pulse | MIIT | .987 | 127 | .352 |
| HIIT | .986 | 82 | .531 |
| VO2/WR | MIIT | .992 | 127 | .730 |
| HIIT | .982 | 82 | .358 |
| VE/VCO2@AT | MIIT | .983 | 127 | .162 |
| HIIT | .983 | 82 | .395 |
| VE/VCO2 slope | MIIT | .989 | 127 | .490 |
| HIIT | .979 | 82 | .229 |
| PETCO2 | MIIT | .991 | 127 | .635 |
| HIIT | .983 | 82 | .406 |
| GAD-7 | MIIT | .989 | 127 | .452 |
| HIIT | .988 | 82 | .680 |
| PHQ-9 | MIIT | .990 | 127 | .538 |
| HIIT | .959 | 82 | .013 |
| Waist circumference | MIIT | .978 | 127 | .052 |
| HIIT | .979 | 82 | .219 |
| Hip circumference | MIIT | .981 | 127 | .096 |
| HIIT | .975 | 82 | .121 |
| Left thigh circumference | MIIT | .993 | 127 | .818 |
| HIIT | .984 | 82 | .435 |
| Right thigh circumference | MIIT | .988 | 127 | .404 |
| HIIT | .984 | 82 | .434 |
| Left calf circumference | MIIT | .989 | 127 | .498 |
| HIIT | .989 | 82 | .730 |
| Right calf circumference | MIIT | .995 | 127 | .955 |
| HIIT | .977 | 82 | .168 |
| Left upper arm | MIIT | .983 | 127 | .149 |
| HIIT | .970 | 82 | .064 |
| Right upper arm | MIIT | .985 | 127 | .227 |
| HIIT | .981 | 82 | .284 |

Table S6. Influence diagnostics (Cook’s Distance and Leverage Values) for physical ability and aerobic metabolism in HIIT, MIIT, and combined groups

| Group |  | Exercise time | | Maximum load | | Peak VO2 | | AT VO2 | | O2pulse | | VO2/WR | |
| --- | --- | --- | --- | --- | --- | --- | --- | --- | --- | --- | --- | --- | --- |
| Cook’s D | Leverage | Cook’s D | Leverage | Cook’s D | Leverage | Cook’s D | Leverage | Cook’s D | Leverage | Cook’s D | Leverage |
| HIIT | Median | .0014 | .0240 | .0013 | .0251 | .0019 | .0014 | .0250 | .0014 | .0017 | .0251 | .0017 | .0247 |
| Mean | .0050 | .0287 | .0074 | .0288 | .0045 | .0051 | .0288 | .0051 | .0063 | .0286 | .0054 | .0284 |
| MIIT | Median | .0022 | .0268 | .0013 | .0258 | .0014 | .0012 | .0266 | .0012 | .0017 | .0278 | .0009 | .0262 |
| Mean | .0069 | .0296 | .0034 | .0292 | .0040 | .0039 | .0289 | .0039 | .0047 | .0293 | .0035 | .0293 |
| ALL | Median | .0017 | .0249 | .0013 | .0256 | .0018 | .0013 | .0259 | .0013 | .0017 | .0263 | .0013 | .0255 |
| Mean | .0058 | .0290 | .0058 | .0290 | .0043 | .0046 | .0288 | .0046 | .0057 | .0289 | .0047 | .0288 |

Table S7. Influence diagnostics (Cook’s Distance and Leverage Values) for heart rate and blood pressure responses in HIIT, MIIT, and combined groups

| Group |  | Resting HR | | Peaking HR | | HRR | | Resting SBP | | Resting DBP | | Peaking SBP | | Peaking DBP | |
| --- | --- | --- | --- | --- | --- | --- | --- | --- | --- | --- | --- | --- | --- | --- | --- |
| Cook’s D | Leverage | Cook’s D | Leverage | Cook’s D | Leverage | Cook’s D | Leverage | Cook’s D | Leverage | Cook’s D | Leverage | Cook’s D | Leverage |
| HIIT | Median | .0018 | .0246 | .0017 | .0251 | .0016 | .0238 | .0012 | .0016 | .0238 | .0012 | .0018 | .0246 | .0017 | .0251 |
| Mean | .0061 | .0286 | .0063 | .0286 | .0047 | .0287 | .0040 | .0047 | .0287 | .0040 | .0061 | .0286 | .0063 | .0286 |
| MIIT | Median | .0016 | .0280 | .0017 | .0278 | .0017 | .0278 | .0024 | .0017 | .0278 | .0024 | .0016 | .0280 | .0017 | .0278 |
| Mean | .0046 | .0293 | .0047 | .0293 | .0048 | .0298 | .0046 | .0048 | .0298 | .0046 | .0046 | .0293 | .0047 | .0293 |
| ALL | Median | .0017 | .0264 | .0017 | .0263 | .0017 | .0261 | .0013 | .0017 | .0261 | .0013 | .0017 | .0264 | .0017 | .0263 |
| Mean | .0055 | .0289 | .0057 | .0289 | .0048 | .0291 | .0043 | .0048 | .0291 | .0043 | .0055 | .0289 | .0057 | .0289 |

Table S8. Influence diagnostics (Cook’s Distance and Leverage Values) for ventilation and gas exchange in HIIT, MIIT, and combined groups

| Group |  | RER | | VO2/WR | | VE/VCO2@AT | | VE/VCO2 slope | | PETCO2 | |
| --- | --- | --- | --- | --- | --- | --- | --- | --- | --- | --- | --- |
| Cook’s D | Leverage | Cook’s D | Leverage | Cook’s D | Leverage | Cook’s D | Leverage | Cook’s D | Leverage |
| HIIT | Median | .0018 | .0230 | .0018 | .0239 | .0015 | .0244 | .0012 | .0237 | .0018 | .0249 |
| Mean | .0063 | .0291 | .0050 | .0287 | .0049 | .0289 | .0046 | .0279 | .0045 | .0287 |
| MIIT | Median | .0018 | .0253 | .0011 | .0266 | .0020 | .0271 | .0014 | .0268 | .0015 | .0260 |
| Mean | .0052 | .0289 | .0034 | .0294 | .0046 | .0287 | .0051 | .0285 | .0041 | .0294 |
| ALL | Median | .0018 | .0244 | .0014 | .0257 | .0016 | .0259 | .0012 | .0248 | .0017 | .0257 |
| Mean | .0059 | .0290 | .0044 | .0290 | .0048 | .0288 | .0048 | .0281 | .0044 | .0290 |

Table S9. Influence diagnostics (Cook’s Distance and Leverage Values) for psychological scales and body measurements in HIIT, MIIT, and combined groups

| Group |  | PHQ-9 | | GAD -7 | | Waist | | Hip | |
| --- | --- | --- | --- | --- | --- | --- | --- | --- | --- |
| Cook’s D | Leverage | Cook’s D | Leverage | Cook’s D | Leverage | Cook’s D | Leverage |
| HIIT | Median | .0010 | .0248 | .0005 | .0244 | .0007 | .0211 | .0009 | .0223 |
| Mean | .0055 | .0281 | .0023 | .0273 | .0049 | .0271 | .0042 | .0266 |
| MIIT | Median | .0008 | .0254 | .0006 | .0269 | .0014 | .0281 | .0015 | .0260 |
| Mean | .0028 | .0279 | .0022 | .0286 | .0049 | .0306 | .0047 | .0287 |
| ALL | Median | .0009 | .0252 | .0006 | .0256 | .0010 | .0242 | .0011 | .0235 |
| Mean | .0044 | .0280 | .0022 | .0279 | .0049 | .0285 | .0044 | .0274 |

Table S10. Influence diagnostics (Cook’s Distance and Leverage Values) for body circumference in HIIT, MIIT, and combined groups

| Group |  | Left thigh | | Right thigh | | Left calf | | Right calf | | Left upper arm | | Right upper arm | |
| --- | --- | --- | --- | --- | --- | --- | --- | --- | --- | --- | --- | --- | --- |
| Cook’s D | Leverage | Cook’s D | Leverage | Cook’s D | Leverage | Cook’s D | Leverage | Cook’s D | Leverage | Cook’s D | Leverage |
| HIIT | Median | .0012 | .0240 | .0012 | .0235 | .0008 | .0216 | .0011 | .0222 | .0008 | .0227 | .0011 | .0224 |
| Mean | .0054 | .0273 | .0057 | .0277 | .0040 | .0260 | .0045 | .0262 | .0045 | .0278 | .0058 | .0275 |
| MIIT | Median | .0026 | .0269 | .0022 | .0273 | .0017 | .0265 | .0015 | .0265 | .0012 | .0268 | .0024 | .0277 |
| Mean | .0066 | .0297 | .0064 | .0292 | .0055 | .0294 | .0058 | .0293 | .0033 | .0292 | .0055 | .0299 |
| ALL | Median | .0019 | .0257 | .0015 | .0259 | .0010 | .0245 | .0012 | .0251 | .0009 | .0241 | .0017 | .0250 |
| Mean | .0059 | .0283 | .0060 | .0283 | .0046 | .0274 | .0051 | .0274 | .0040 | .0283 | .0057 | .0285 |

Table S11. Collinearity diagnostics (VIF and Tolerance) for dependent variables

| Dependent variable | VIF range | Tolerance range |
| --- | --- | --- |
| Exercise time | 1.016-1.123 | 0.891-0.984 |
| Maximum load | 1.019-1.847 | 0.541-0.981 |
| RER | 1.027-1.096 | 0.912-0.974 |
| Peak VO2 | 1.029-1.212 | 0.825-0.971 |
| AT VO2 | 1.013-1.093 | 0.915-0.987 |
| Resting HR | 1.020-1.132 | 0.883-0.980 |
| Peaking HR | 1.038-1.197 | 0.835-0.963 |
| HRR | 1.015-1.082 | 0.924-0.985 |
| Resting SBP | 1.014-1.096 | 0.912-0.987 |
| Resting DBP | 1.013-1.090 | 0.917-0.987 |
| Peaking SBP | 1.017-1.117 | 0.895-0.984 |
| Peaking DBP | 1.012-1.098 | 0.910-0.988 |
| O2 pulse | 1.015-1.843 | 0.543-0.986 |
| VO2/WR | 1.012-1.087 | 0.920-0.988 |
| VE/VCO2@AT | 1.034-1.299 | 0.770-0.967 |
| VE/VCO2 slope | 1.048-1.213 | 0.824-0.954 |
| PETCO2 | 1.038-1.109 | 0.902-0.963 |
| GAD-7 | 1.014-1.136 | 0.880-0.986 |
| PHQ-9 | 1.020-1.124 | 0.890-0.980 |
| Waist circumference | 1.014-3.584 | 0.279-0.986 |
| Hip circumference | 1.014-2.436 | 0.411-0.986 |
| Left thigh circumference | 1.027-2.122 | 0.471-0.974 |
| Right thigh circumference | 1.031-2.052 | 0.487-0.970 |
| Left calf circumference | 1.023-2.091 | 0.478-0.977 |
| Right calf circumference | 1.021-2.067 | 0.484-0.979 |
| Left upper arm | 1.014-2.320 | 0.431-0.987 |
| Right upper arm | 1.015-2.472 | 0.405-0.985 |

Table S12. Durbin-watson statistics and collinearity diagnostics for change variables

| Change variable | Durbin-Watson | VIF range | Tolerance range |
| --- | --- | --- | --- |
| **ALL (n=209)** | |  |  |
| Exercise time | 2.220 | 1.019-1.098 | 0.911-0.981 |
| Maximum load | 2.208 | 1.068-1.108 | 0.902-0.936 |
| Peak VO2 | 2.243 | 1.064-1.083 | 0.923-0.940 |
| AT VO2 | 2.211 | 1.033-1.078 | 0.927-0.968 |
| Resting HR | 2.180 | 1.038-1.115 | 0.897-0.963 |
| Peaking HR | 2.243 | 1.016-1.094 | 0.914-0.984 |
| GAD-7 | 2.223 | 1.015-1.125 | 0.889-0.985 |
| PHQ-9 | 2.220 | 1.015-1.102 | 0.908-0.985 |
| **HIIT (n=82)** | |  |  |
| Exercise time | 2.300 | 1.024-1.195 | 0.837-0.977 |
| Maximum load | 2.268 | 1.106-1.185 | 0.844-0.905 |
| Peak VO2 | 2.320 | 1.050-1.171 | 0.854-0.953 |
| AT VO2 | 2.295 | 1.013-1.180 | 0.848-0.987 |
| Resting HR | 2.337 | 1.028-1.211 | 0.826-0.972 |
| Peaking HR | 2.267 | 1.022-1.185 | 0.844-0.979 |
| GAD-7 | 2.311 | 1.028-1.193 | 0.839-0.973 |
| PHQ-9 | 2.297 | 1.022-1.194 | 0.837-0.979 |
| **MIIT (n=127)** | |  |  |
| Exercise time | 2.161 | 1.043-1.095 | 0.913-0.959 |
| Maximum load | 2.144 | 1.048-1.169 | 0.856-0.955 |
| Peak VO2 | 2.190 | 1.041-1.164 | 0.859-0.961 |
| AT VO2 | 2.139 | 1.076-1.110 | 0.901-0.929 |
| Resting HR | 2.042 | 1.070-1.149 | 0.870-0.935 |
| Peaking HR | 2.186 | 1.030-1.115 | 0.897-0.971 |
| GAD-7 | 2.150 | 1.072-1.123 | 0.890-0.933 |
| PHQ-9 | 2.147 | 1.028-1.118 | 0.895-0.972 |


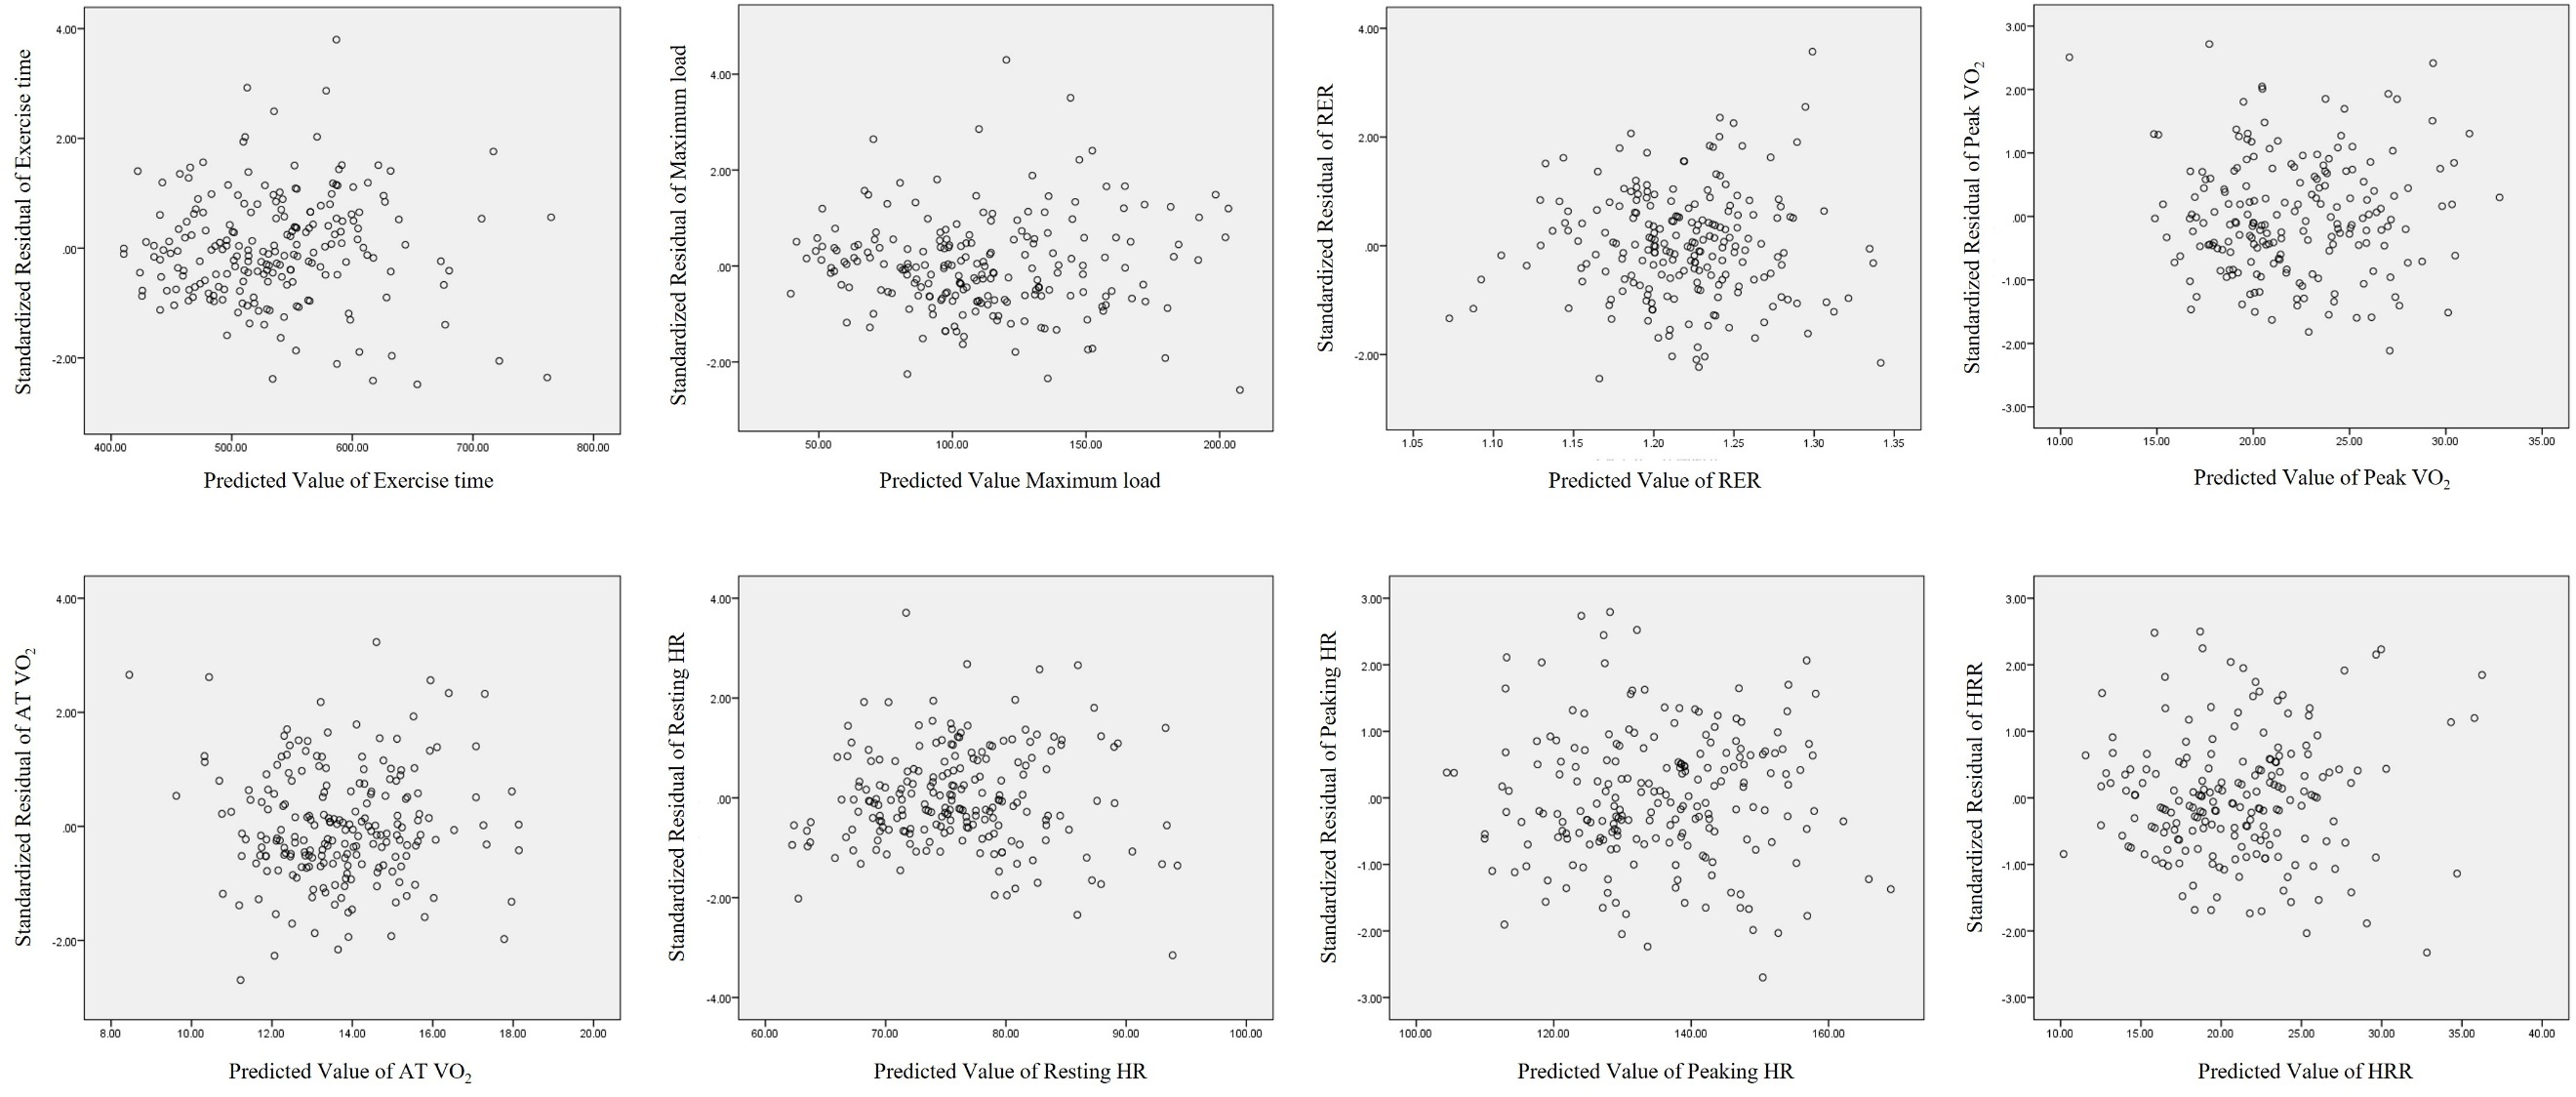


Figure S1. Homoscedasticity assessment for physical performance and heart rate variables


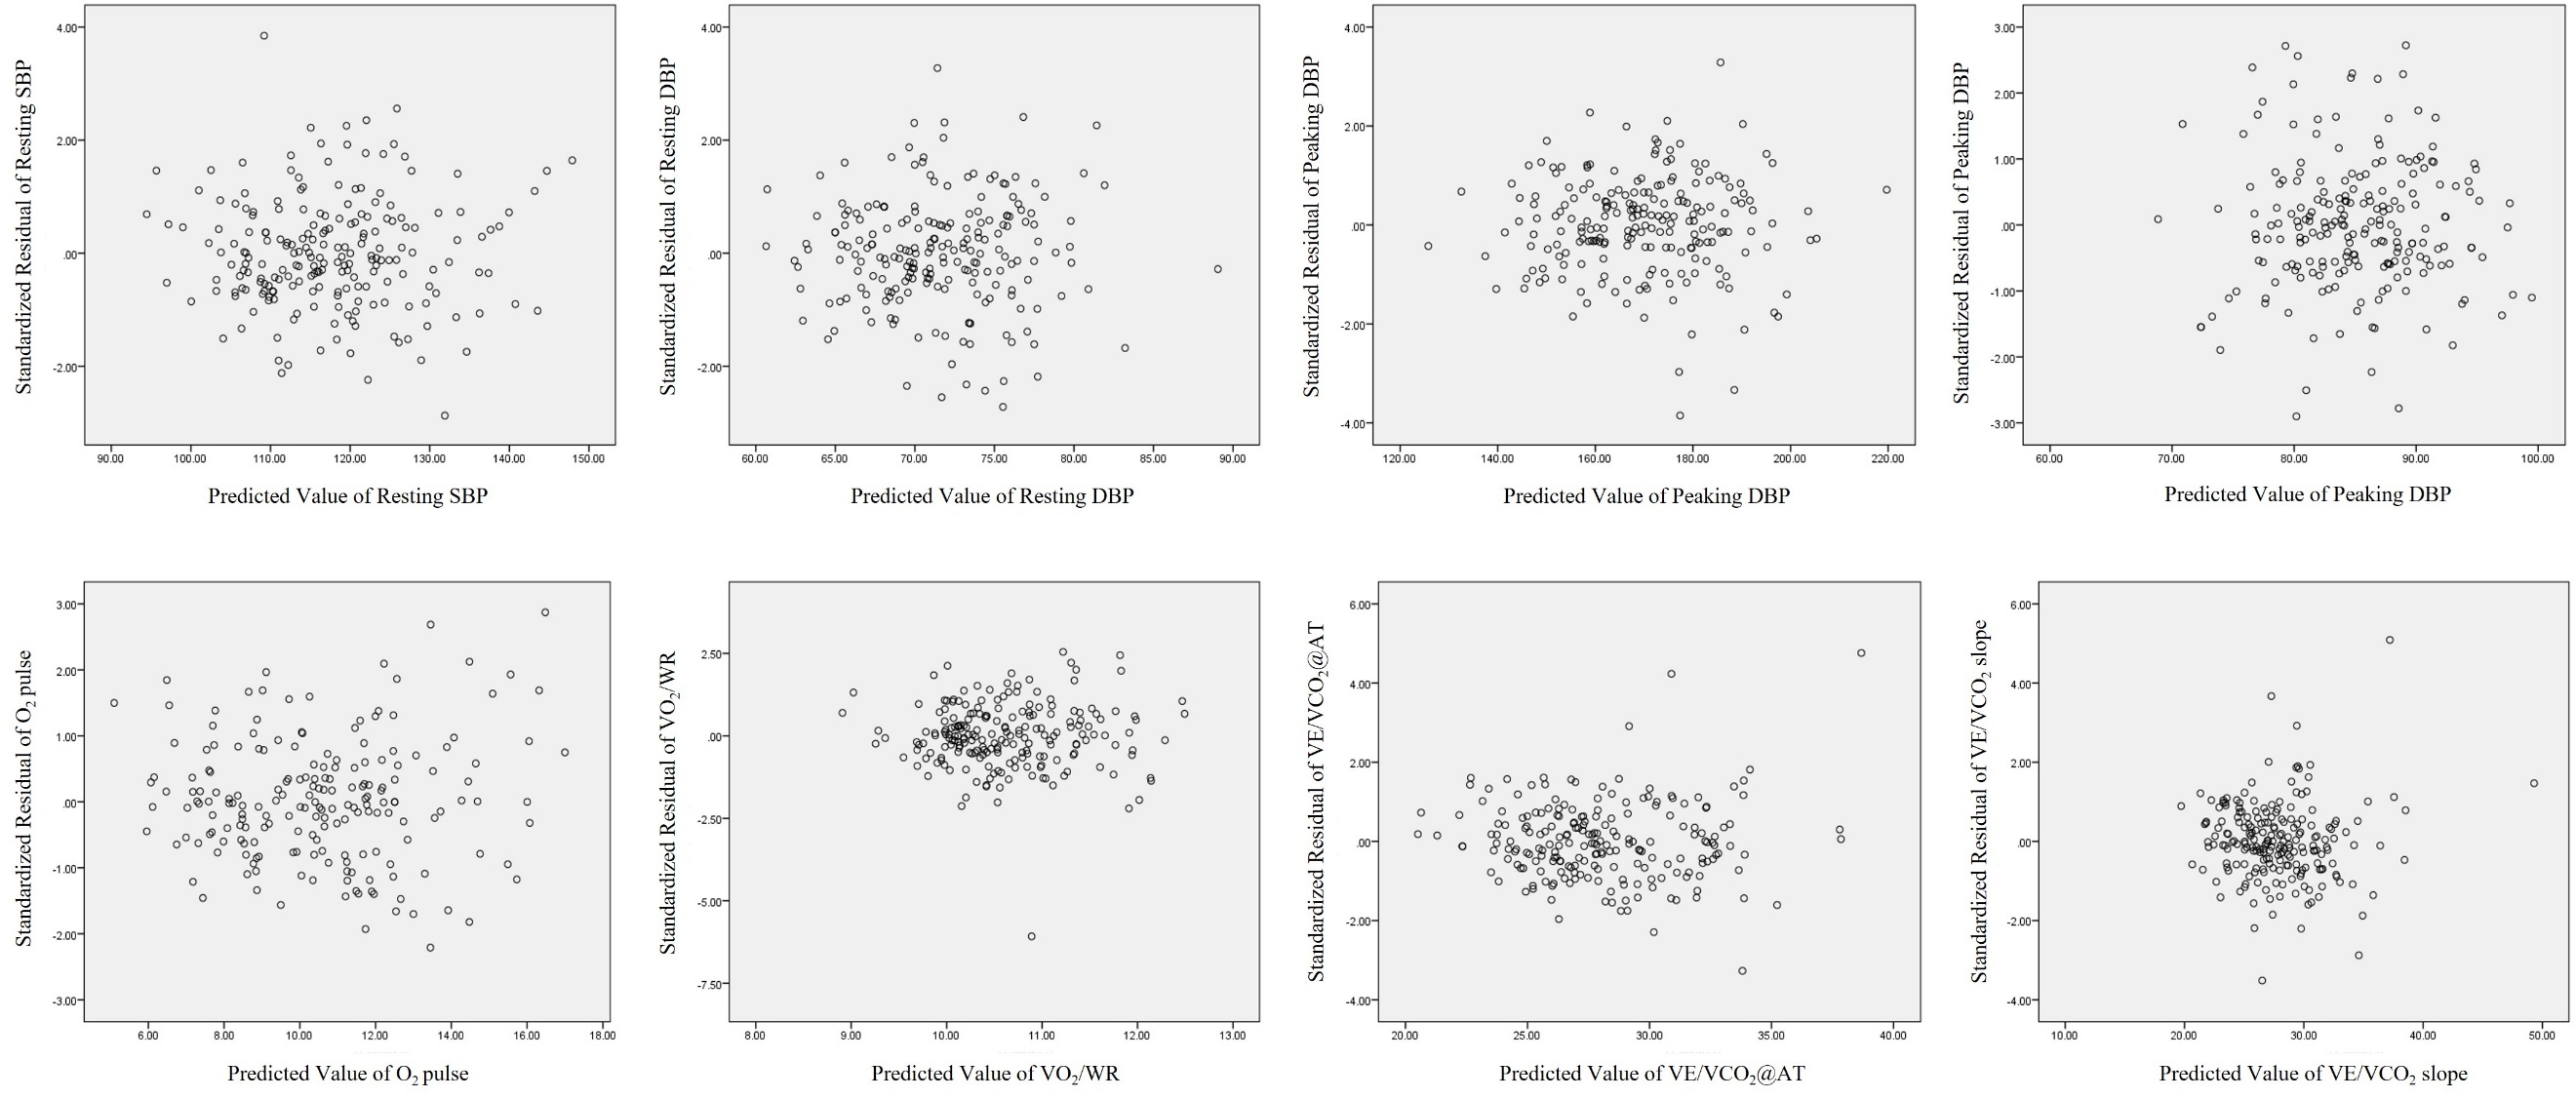
Figure S2. Homoscedasticity assessment for aerobic metabolism, blood pressure and ventilation variables


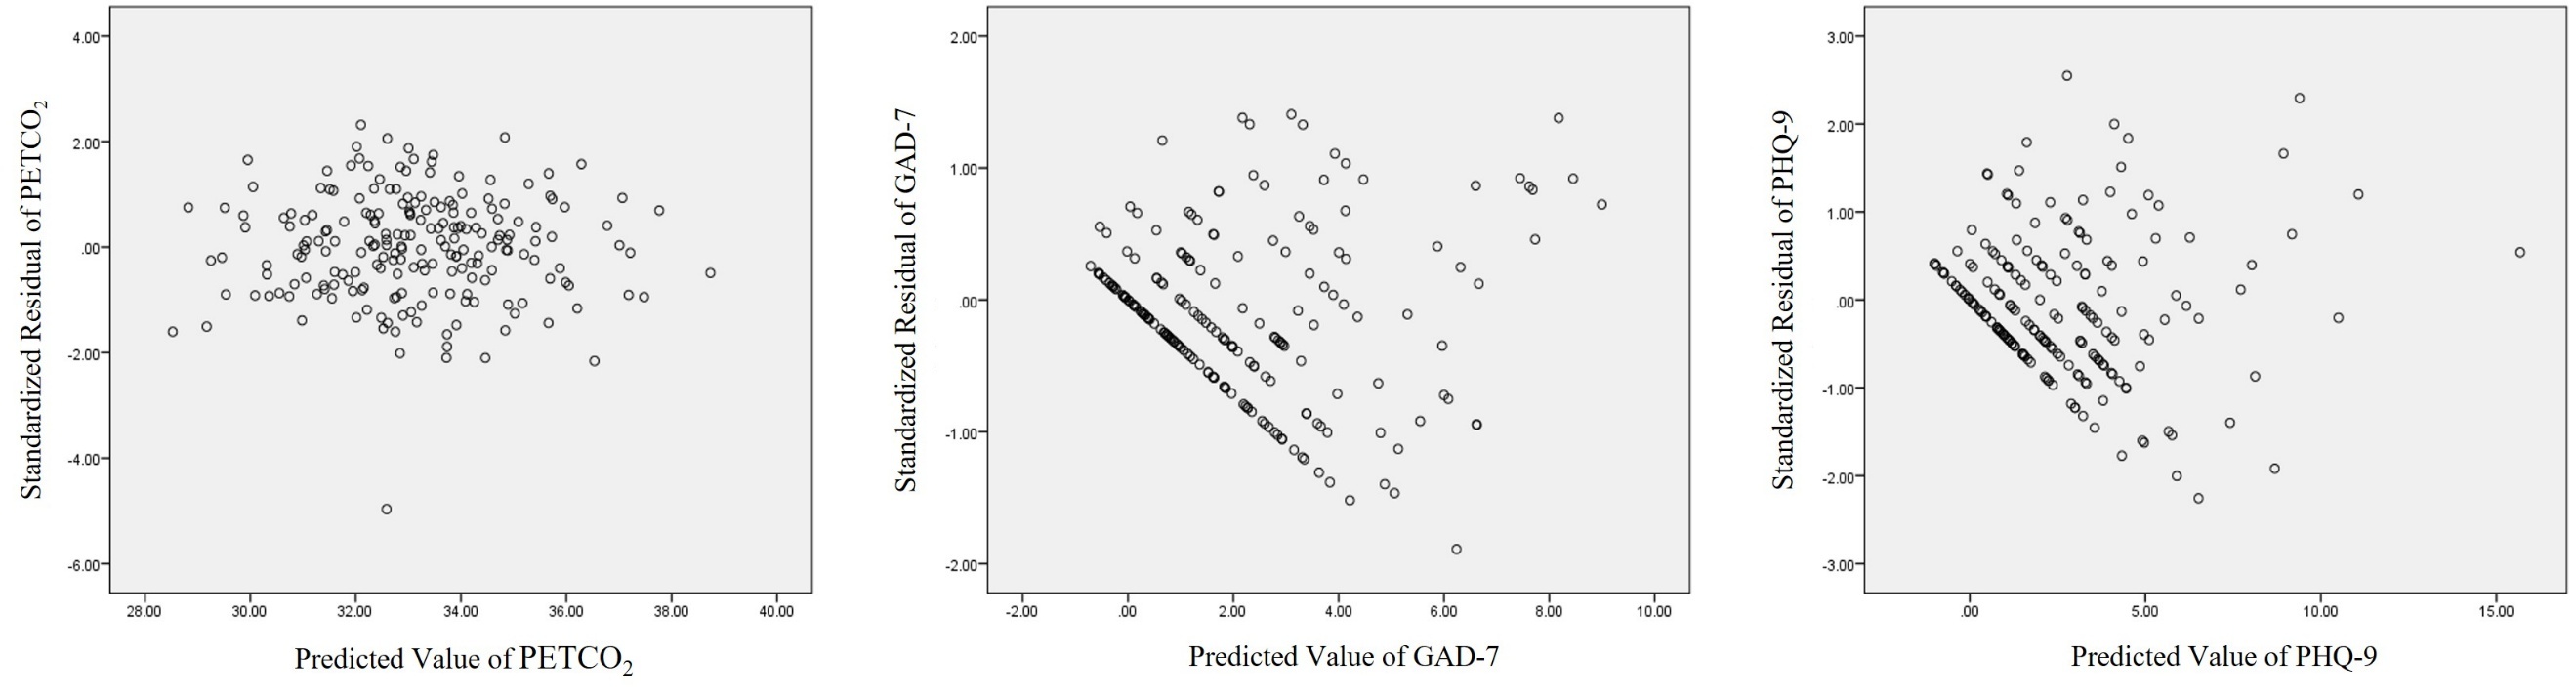
 Figure S3. Homoscedasticity assessment for psychological scale and ventilation variables


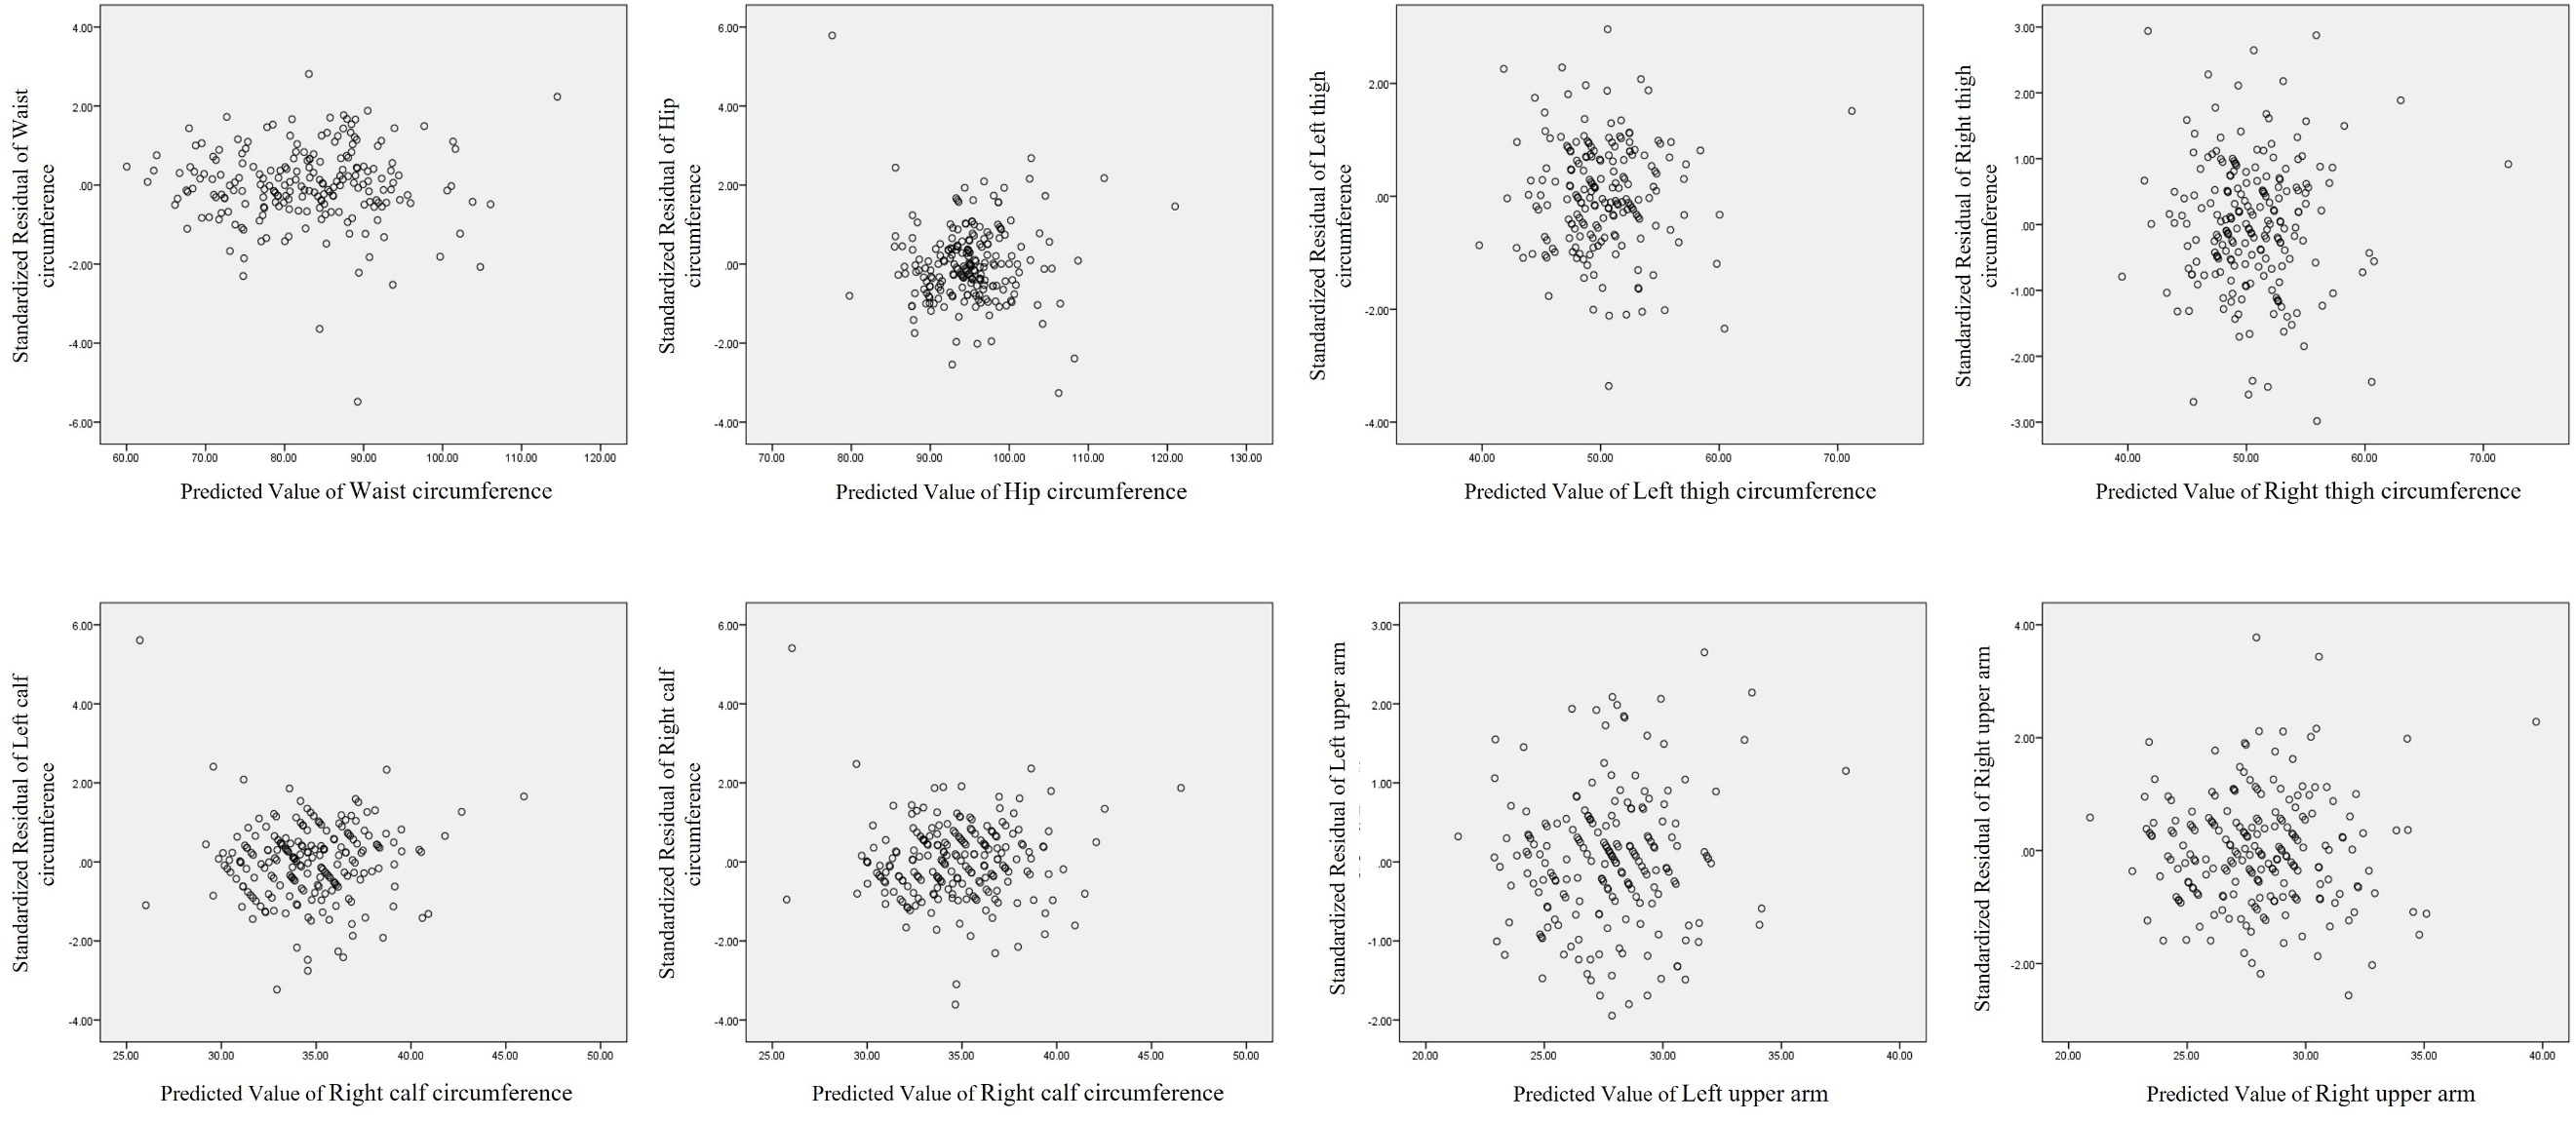


Figure S4. Homoscedasticity assessment for body circumference variables
